# Supplementary material
Source: ML conference proceedings conference paper supplement (https://openaccess.thecvf.com/content/CVPRW_2019/html/Kalavakonda_Autonomous_Neurosurgical_Instrument_CVPRW_2019_paper.html)

### A. NeuroID SAMPLE IMAGES

The figure below shows sample images from the NeuroID dataset, demonstrating the variation in lighting conditions, background, composition, depth of tumor site and types of instruments involved.

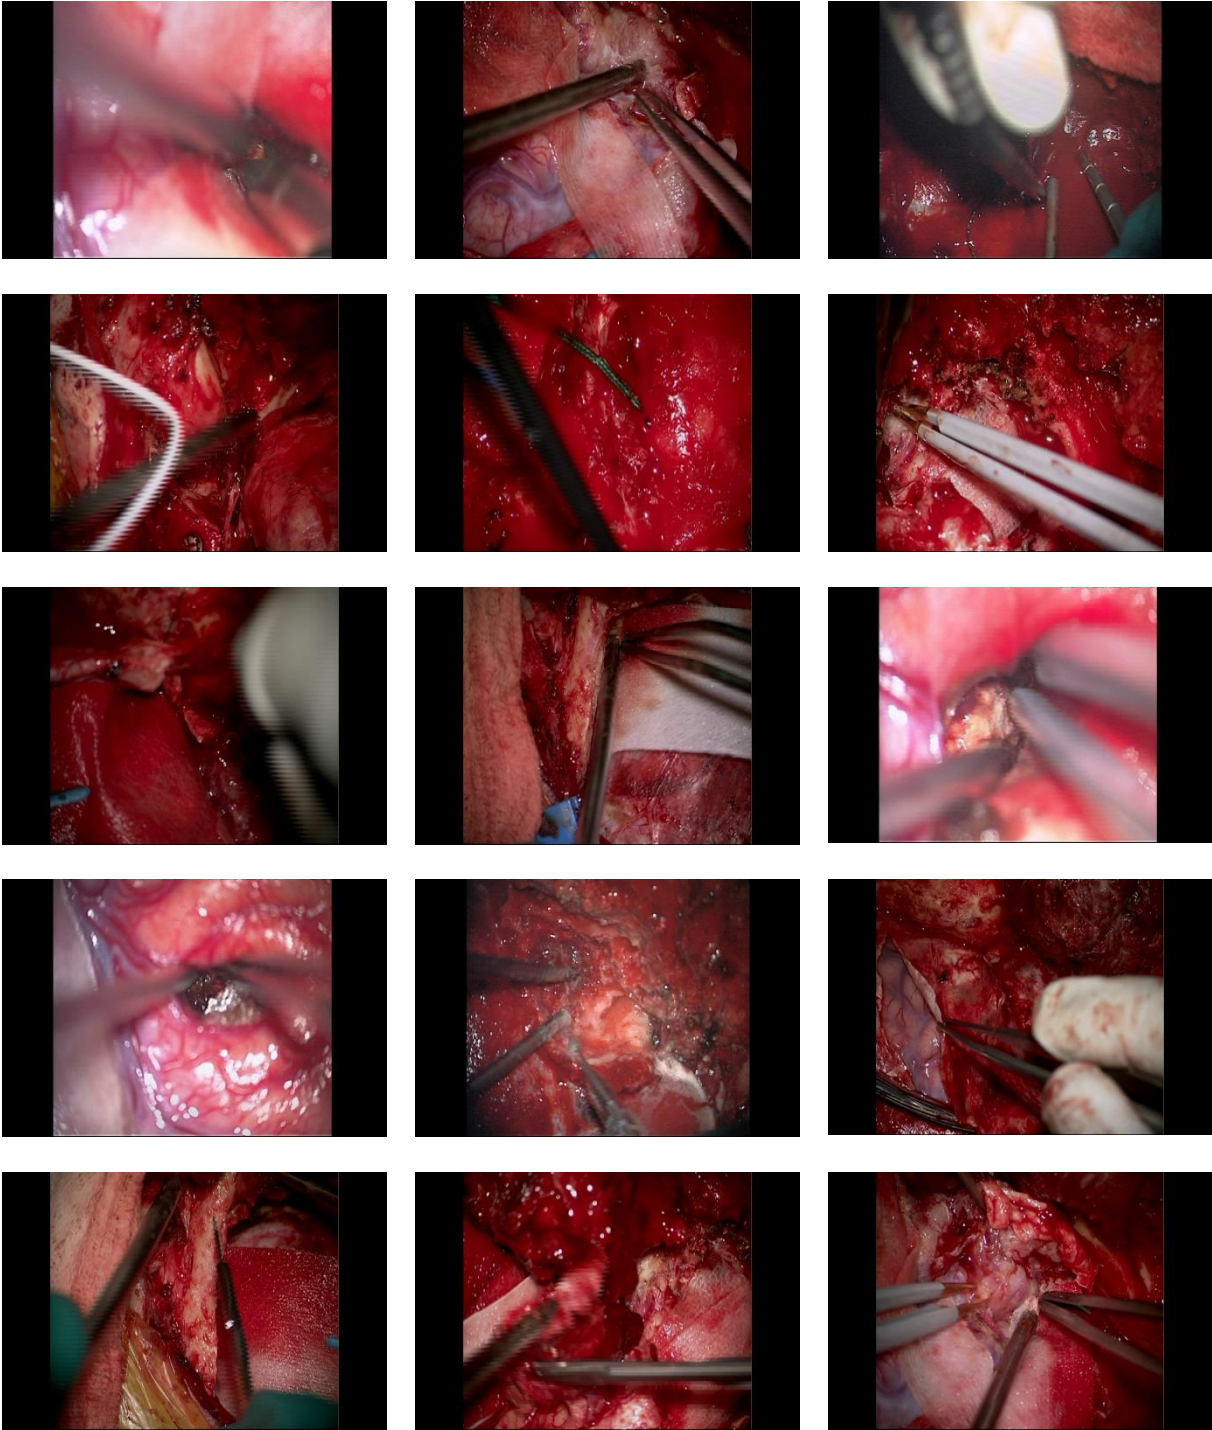

Supplement: Supplementary file 1 [file Kalavakonda_Autonomous_Neurosurgical_Instrument_CVPRW_2019_supplemental.pdf]
